# Supplementary material for: Synthesis, characterization, and anticancer activity of tuna bone gelatin peptide-stabilized selenium nanowires
Source: Royal Society of Chemistry journal article supplement (doi:10.1039/d5ra06829k), 2025-01-01
Supplement: d5ra06829k1.pdf [file d5ra06829k1.pdf]

## Supporting information

for

### Synthesis, Characterization, and Anticancer activity of Tuna Bone Gelatin Peptide-Stabilized Selenium Nanowires

Muhammad Babar Khawar<sup>#</sup>, Kamaran Khursheed Dar<sup>#</sup>, Ali Afzal<sup>#</sup>, Aisha Munawar, Muhammad Waqas Ishaq, Fakhar Zaman<sup>\*</sup>

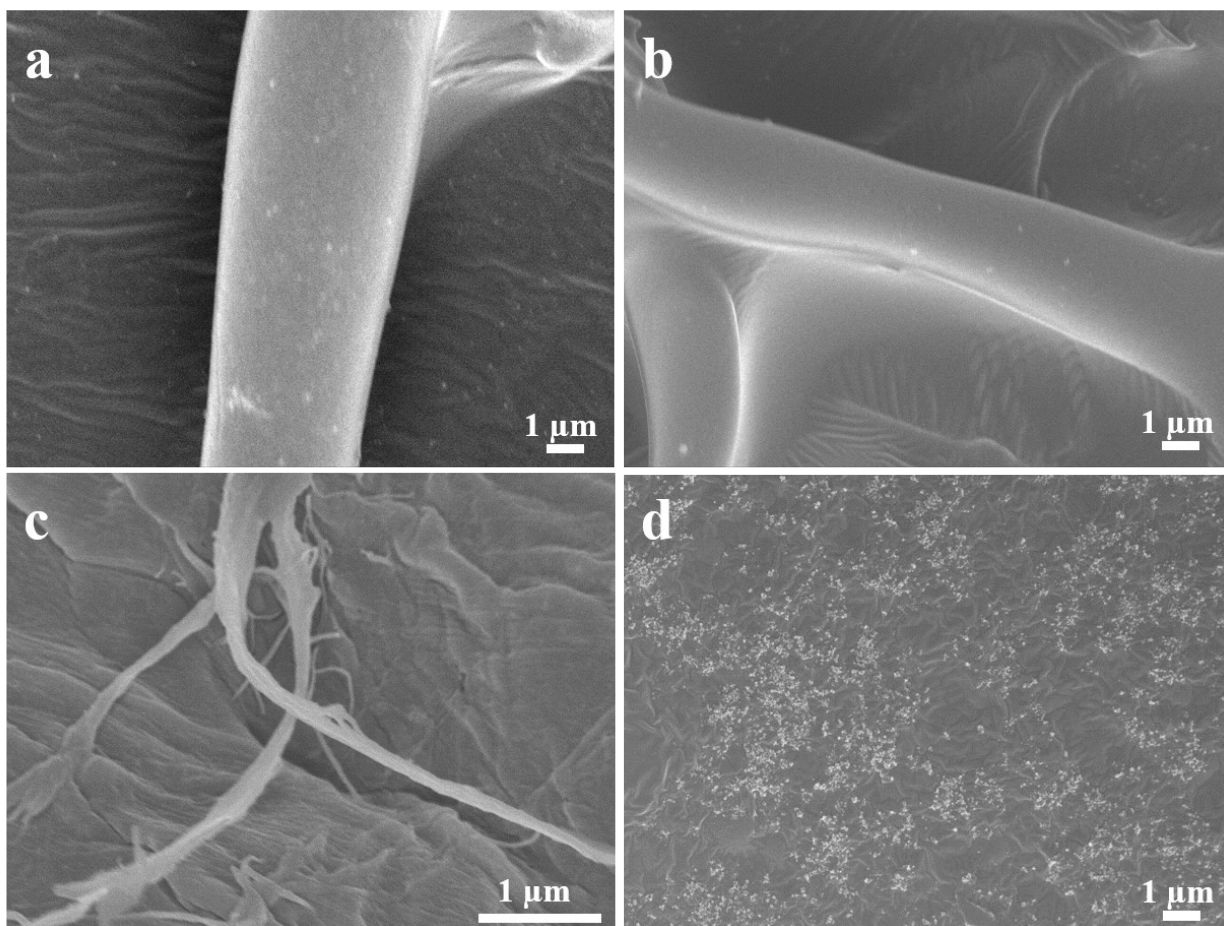

**Figure S1:** Scanning electron microscopy (SEM) analysis of TBGP@Se complexes at different concentrations. At  $1 \text{ mg mL}^{-1}$  (a) and  $3 \text{ mg mL}^{-1}$  (b), elongated fibrillary structures with partial aggregation are observed, suggesting incomplete stabilization of selenium species. At higher concentrations,  $7 \text{ mg mL}^{-1}$  (c) and  $10 \text{ mg mL}^{-1}$  (d).

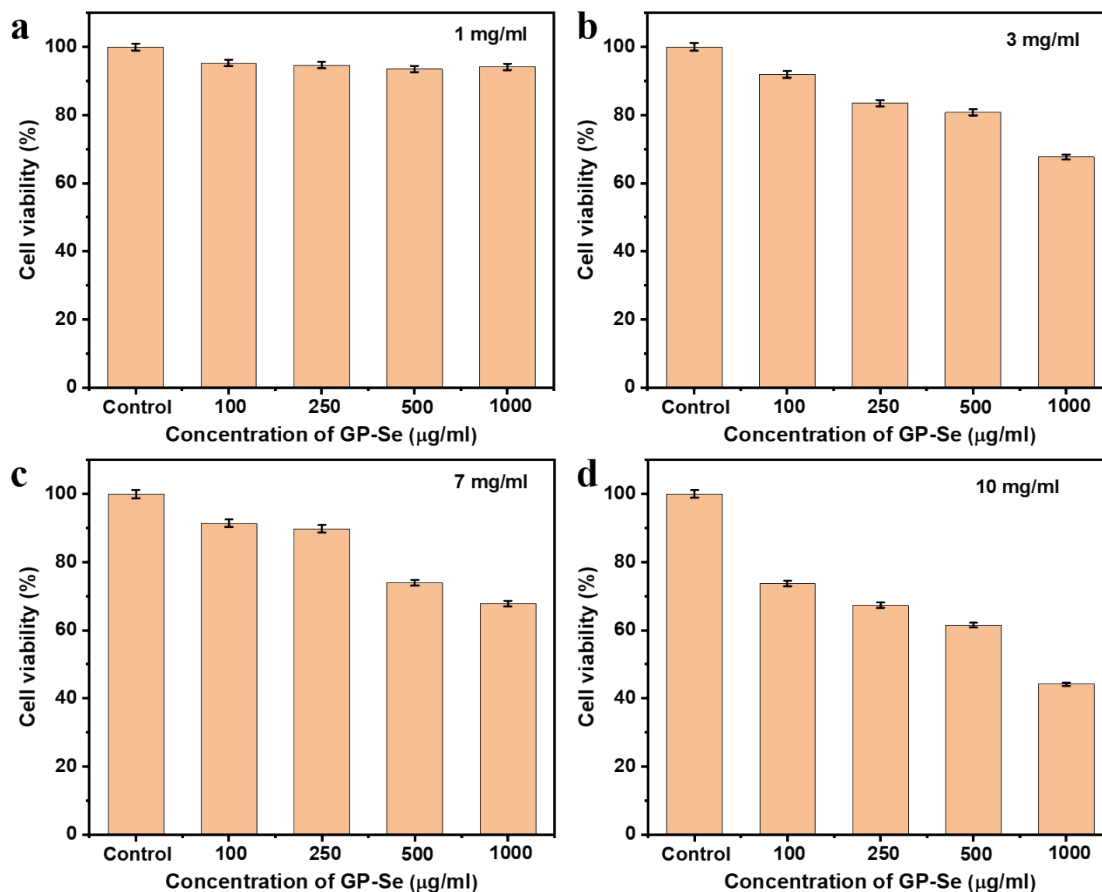

**Figure S2: Antiproliferation activity of TBGP@Se against A549 at (a) 1, (b) 3, (c) 7, and (d) 10 mg/mL concentration.**
